# Supplementary material for: A Comparative Transcriptomic Analysis Reveals That HSP90AB1 Is Involved in the Immune and Inflammatory Responses to Porcine Deltacoronavirus Infection
Source: MDPI journal article supplement (doi:10.3390/ijms23063280), 2022-03-18
Supplement: s1 [file s1]

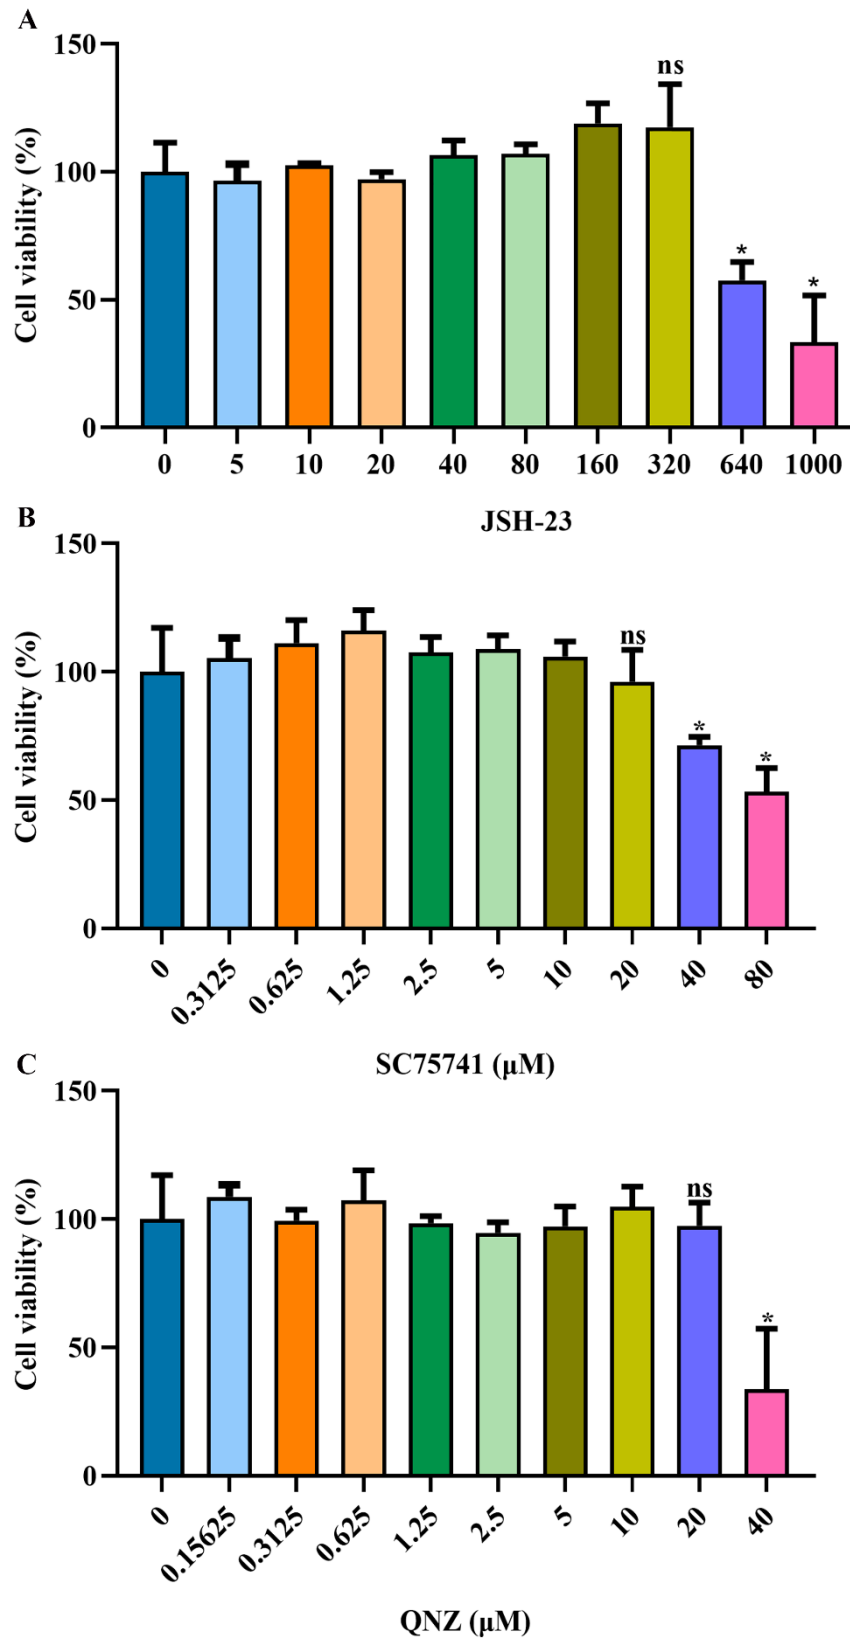

**Figure S4. The cytotoxicity of NF- $\kappa$ B inhibitors toward LLC-PK cells.** Cell viability was analyzed at 24 h posttreatment by JSH-23 (A) SC75741 (B) and QNZ (C) using the CCK-8 assay.
