# Supplementary material for: A Comparative Transcriptomic Analysis Reveals That HSP90AB1 Is Involved in the Immune and Inflammatory Responses to Porcine Deltacoronavirus Infection
Source: MDPI journal article supplement (doi:10.3390/ijms23063280), 2022-03-18
Supplement: s1 [file s1]

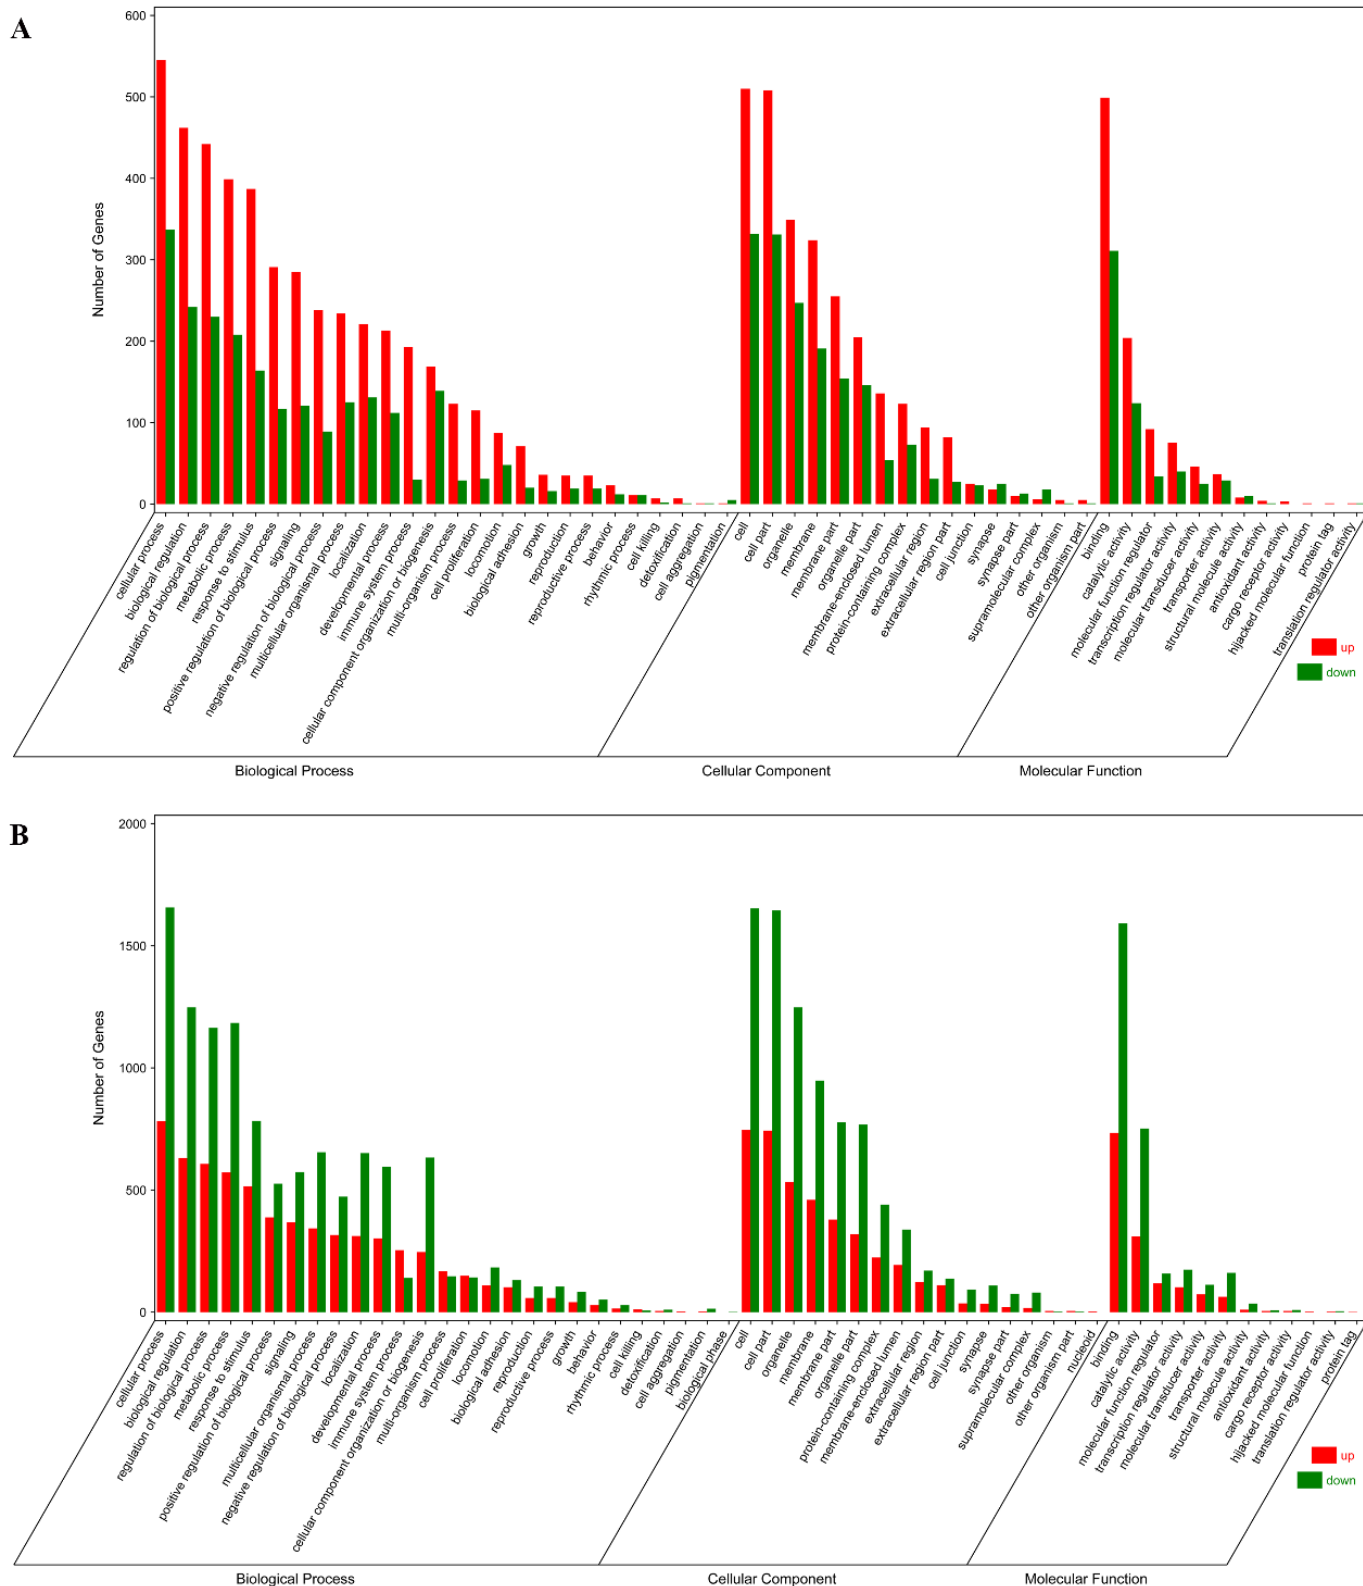

**Figure S2 GO enrichment analysis of the DEGs identified in HSP90AB1<sup>WT</sup> (A) and HSP90AB1<sup>KO</sup> (B) cells following PDCoV infection.**
