# Supplementary figures and images for: A Comparative Transcriptomic Analysis Reveals That HSP90AB1 Is Involved in the Immune and Inflammatory Responses to Porcine Deltacoronavirus Infection
Source: MDPI journal article supplement (doi:10.3390/ijms23063280), 2022-03-18

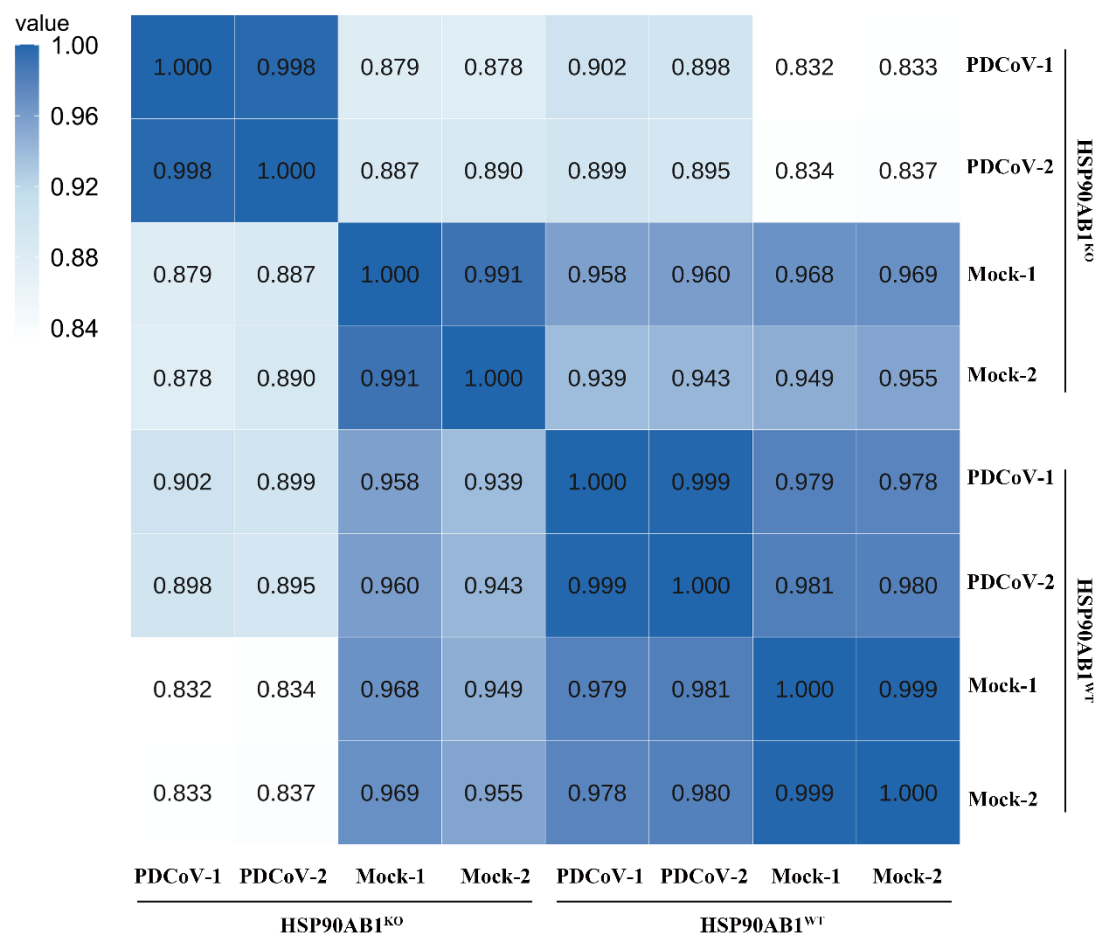

**Figure S1. Heatmap showing the correlations between biological replicates.**

Supplement: s1 [file s1]
